# Supplementary material
Source: PubMed Central journal article supplement (PMC4246930)
Supplement: pnas.201410785SI.pdf [file pnas.201410785SI.pdf]

# Supporting Information

Wang and Quake 10.1073/pnas.1410785111

## SI Materials and Methods

**Cell Culture.** Burkitt's lymphoma cell lines Raji, Namalwa, and DG-75 were obtained from ATCC and cultured in RPMI 1640 supplemented with 10% FBS and PSA, following ATCC recommendations. Human primary lung fibroblast IMR-90 was obtained from Coriell and cultured in Advanced DMEM/F-12 supplemented with 10% FBS and PSA.

**Plasmid Cloning.** We obtained pX458 from Addgene. A modified CMV promoter with a synthetic intron (pmax) was PCR amplified from Lonza control plasmid pmax-GFP. A modified guide RNA sgRNA<sup>(F+E)</sup> was ordered from IDT. Epstein-Barr virus (EBV) replication origin oriP was PCR-amplified from B95-8 transformed lymphoblastoid cell line GM12891. We used standard cloning protocols to clone pmax, sgRNA<sup>(F+E)</sup> and oriP to pX458, to replace the original CAG promoter, sgRNA and f1 origin. We designed EBV sgRNA based on the B95-8 reference, and ordered DNA oligos from IDT. The original sgRNA place holder in pX458 served as the negative control.

**DNA Transfection.** We used the Lonza Nucleofector II for DNA delivery. Five million Raji or DG-75 cells were transfected with 5- $\mu$ g plasmids in each 100- $\mu$ L reaction. Cell line Kit V and program M-013 were used following Lonza recommendation.

For IMR-90, one million cells were transfected with 5- $\mu$ g plasmids in 100  $\mu$ L Solution V, with program T-030 or X-005.

**Flow Cytometry and Cell Sorting.** Two days after transfection, we sorted live GFP<sup>+</sup> cells for further culture. Annexin V Alexa647 was purchased from Life Technologies and used following the manufacturer's instructions.

**Cell Proliferation Measurement.** Raji and DG-75 cells were counted daily after initial flow sorting. IMR-90 cells were subcultured and counted every 2 d after initial flow sorting. Cell counts were normalized to the initial count 1 d after initial flow sorting. Five to 6 d after initial flow sorting (7–8 d after transfection), we sorted the live and dead cells for DNA analysis.

**DNA Analysis.** DNA sequences flanking sgRNA targets were PCR amplified with Phusion DNA polymerase (Table S2). SURVEYOR assays were performed following the manufacturer's instructions. DNA amplicons with large deletions were TOPO-cloned and single colonies were used for Sanger sequencing. EBV load was measured with Taqman digital PCR on Fluidigm BioMark. A Taqman assay targeting a conserved human locus was used for human DNA normalization. One nanogram of single-cell whole-genome amplification products from Fluidigm C1 were used for EBV quantitative PCR.

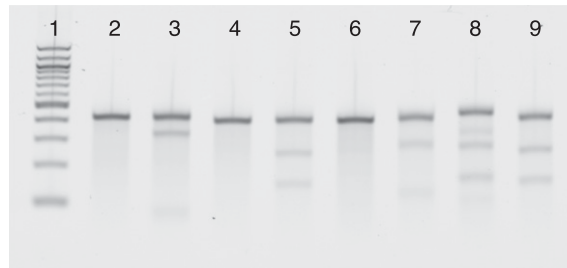

**Fig. S1.** SURVEYOR assay of EBV clustered regularly interspaced short palindromic repeat (CRISPR). (Lane 1) New England Biolabs 100-bp ladder; (lane 2) sgEBV1 control; (lane 3) sgEBV1; (lane 4) sgEBV5 control; (lane 5) sgEBV5; (lane 6) sgEBV7 control; (lane 7) sgEBV7; (lane 8) sgEBV4.

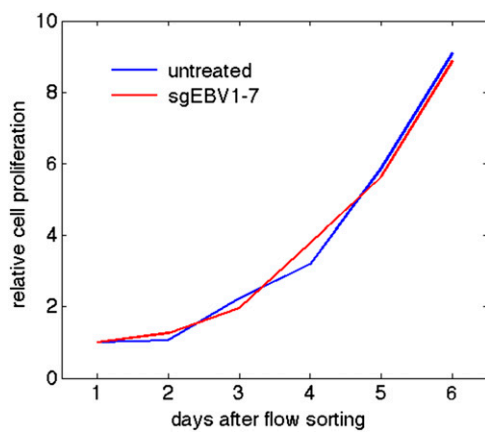

Fig. S2. CRISPR cytotoxicity test with EBV<sup>-</sup> Burkitt's lymphoma DG-75.

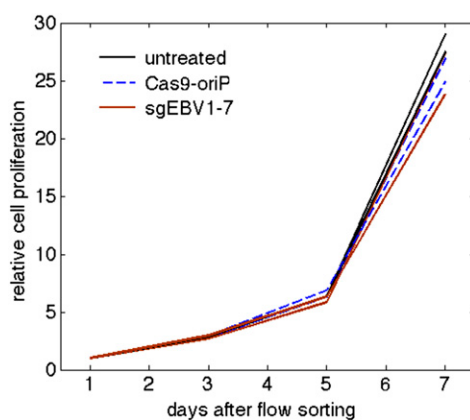

Fig. S3. CRISPR cytotoxicity test with primary human lung fibroblast IMR-90.

**Table S1. Guide RNA target sequences**

| Guide RNA | Sequence             |
|-----------|----------------------|
| sgEBV1    | GCCCTGGACCAACCCGGCCC |
| sgEBV2    | GGCCGCTGCCCCGCTCCGGG |
| sgEBB3    | GGAAGACAATGTGCCGCCA  |
| sgEBV4    | TCTGGACCAGAAGGCTCCGG |
| sgEBV5    | GCTGCCCGGGAGGGTGATGA |
| sgEBV6    | GGTGGCCCACCGGTCCGCT  |
| sgEBV7    | GTCTCGAGGGGGCCGTCGC  |

**Table S2. PCR Primers**

| Primer   | Sequence              |
|----------|-----------------------|
| sgEBV1F  | TGCTAGGCCACCTTCTCAGT  |
| sgEBV1R  | GTAGTGTGTGCCTGGGTGTG  |
| sgEBV2F  | AGCATGGCGAAGTAGACAGG  |
| sgEBV2R  | GCCCATTCGAACCTACC     |
| sgEBV3F  | TTCAGACCCACCATGGAAT   |
| sgEBV3R  | CCCATGAACCCAGTTAGAGG  |
| sgEBV4F  | GGCTGCGAGTAATGGTGAT   |
| sgEBV4R  | CAATGCAACTTGGACGTTTTT |
| sgEBV5F  | GCTGAGGTTTTGAAGGATGC  |
| sgEBV5R  | GGAGCTGAGTGACGTGACAA  |
| sgEBV7F  | AGTAAGGGAAAGGGGTGTG   |
| sgEBV7R  | GACGTAGCCGCCCTACATAA  |
| oriP_F   | CCACCAATTCCAACCATTTT  |
| oriP_R   | CGCGGGGCAGTGCAT       |
| EBNA1_qF | CCTCCTGGTTTCCACCTAT   |
| EBNA1_qR | CCTCCTTCATCTCCGTCATC  |
| EBNA1_qP | TCCGTCATCACCCCTCCGC   |
